# Supplementary material for: A BioBrick compatible strategy for genetic modification of plants
Source: PubMed Central journal article supplement (PMC3537565; doi:10.1186/1754-1611-6-8), 2012-06-20
Supplement: 1754-1611-6-8-S1.pdf [file 1754-1611-6-8-S1.pdf]

## Supplementary Data for A BioBrick Compatible Strategy for Genetic Modification of Plants.

Patrick M. Boyle<sup>1\*</sup>, Devin R. Burrill<sup>1\*</sup>, Mara C. Inniss<sup>1\*</sup>, Christina M. Agapakis<sup>1‡\*</sup>, Aaron Deardon<sup>2†</sup>, Jonathan G. DeWerd<sup>2†</sup>, Michael A. Gedeon<sup>2†</sup>, Jacqueline Y. Quinn<sup>2†</sup>, Morgan L. Paull<sup>2†</sup>, Anugraha M. Raman<sup>2†</sup>, Mark R. Theilmann<sup>2†</sup>, Lu Wang<sup>2†</sup>, Julia C. Winn<sup>2†</sup>, Oliver Medvedik<sup>3</sup>, Kurt Schellenberg<sup>4</sup>, Karmella A. Haynes<sup>1¶</sup>, Alain Viel<sup>3</sup>, Tamara J. Brenner<sup>3</sup>, George M. Church<sup>5,6</sup>, Jagesh V. Shah<sup>1§</sup>, and Pamela A. Silver<sup>1,5§</sup>

<sup>1</sup> Department of Systems Biology, Harvard Medical School, Boston, MA 02115

<sup>2</sup> Harvard College, Harvard University, Cambridge, MA 02138

<sup>3</sup> Department of Molecular and Cellular Biology, Harvard University, Cambridge, MA 02138

<sup>4</sup> The Arnold Arboretum of Harvard University, Jamaica Plain, MA 02131

<sup>5</sup> Wyss Institute for Biologically Inspired Engineering, Harvard University, Boston, MA 02115

<sup>6</sup> Department of Genetics, Harvard Medical School, Boston, MA 02115

\* These authors contributed equally to this work

† These authors contributed equally to this work

§ Corresponding authors

‡ Current Address: Department of Chemical and Biomolecular Engineering, University of California, Los Angeles, CA 90095

¶ Current Address: School of Biological and Health Systems Engineering, Arizona State University, Tempe, AZ 85287

## Supplementary Tables

**Supplementary Table 1 - Primers used to engineer Arabidopsis pORE series transformation vectors (TAIR\*).**

| <b>Primer Name</b> | <b>Sequence</b>                                                                          | <b>Purpose</b>                                                            |
|--------------------|------------------------------------------------------------------------------------------|---------------------------------------------------------------------------|
| O_5'               | GGGAATTcgcgccgcttctagaactagtagcgccgctgcaga                                               | Add MCS** to pORE Open Series vectors O1 and O2 to create V1 and V2       |
| O_3'               | CTAGTctgcagcgccgctactagtctagaagcgccgcaATTCCcgc                                           | Add MCS** to pORE Open Series vectors O1 and O2 to create V1 and V2       |
| E_5'               | cgatAAGCTTgggatcttctgcaagcatctc                                                          | Add MCS** to pORE Expression Series vectors E3 and E4 to create V3 and V4 |
| E_3'               | caagaGCTAGCctgcagcgccgctactagtcctctattctagaagcgccgcaattctccggtgggtttgaggtgag             | Add MCS** to pORE Expression Series vectors E3 and E4 to create V3 and V4 |
| R1_5'              | actacgaagcttgaattcgcgccgcttctagaattagaggactagtagcgccgctgcagAgagctcatgttacgtcctgtagaacc   | Add MCS** to pORE Reporter Series vector R1 to create V5                  |
| R1_3'              | caagaGCTAGCAaaaggtaacctattgtttgc                                                         | Add MCS** to pORE Reporter Series vector R1 to create V5                  |
| R3_5'              | actacgaagcttgaattcgcgccgcttctagaattagaggactagtagcgccgctgcagAgagctcatggcgagtaaaggagaagaac | Add MCS** to pORE Reporter Series vector R3 to create V6                  |
| R3_3'              | atctGCTAGCttttgttacctattgtatag                                                           | Add MCS** to pORE Reporter Series vector R3 to create V6                  |

\*Original vectors were provided by The Arabidopsis Information Resource (TAIR)

\*\*MCS: BioBrick multiple cloning site

**Supplementary Table 2 - Primers for testing DNA and RNA expression of miraculin and brazzein in Arabidopsis.**

| <b>Primer Name</b> | <b>Sequence</b>           |
|--------------------|---------------------------|
| BRAZ_5'            | AATTGGCAAACCAAGTGCAA      |
| BRAZ_3'            | TCACAGATACACTGGAGGTTCC    |
| MIR1_5'            | CGTGACTATCGGAGGAGTGAAGGGT |
| MIR1_3'            | CCACACACAGTTGGGCAAAACACA  |
| ACTIN_5'           | TGTGCCAATCTACGAGGGTTT     |
| ACTIN_3'           | TTTCCCGCTCTGCTGTTGT       |
